# Supplementary material for: Molecular and genetic organization of bands and interbands in the dot chromosome of Drosophila melanogaster
Source: PubMed Central journal article supplement (PMC6536484; doi:10.1007/s00412-019-00703-x), 2019-04-30
Supplement: 412_2019_703_MOESM3_ESM.pdf [file 412_2019_703_MOESM3_ESM.pdf]

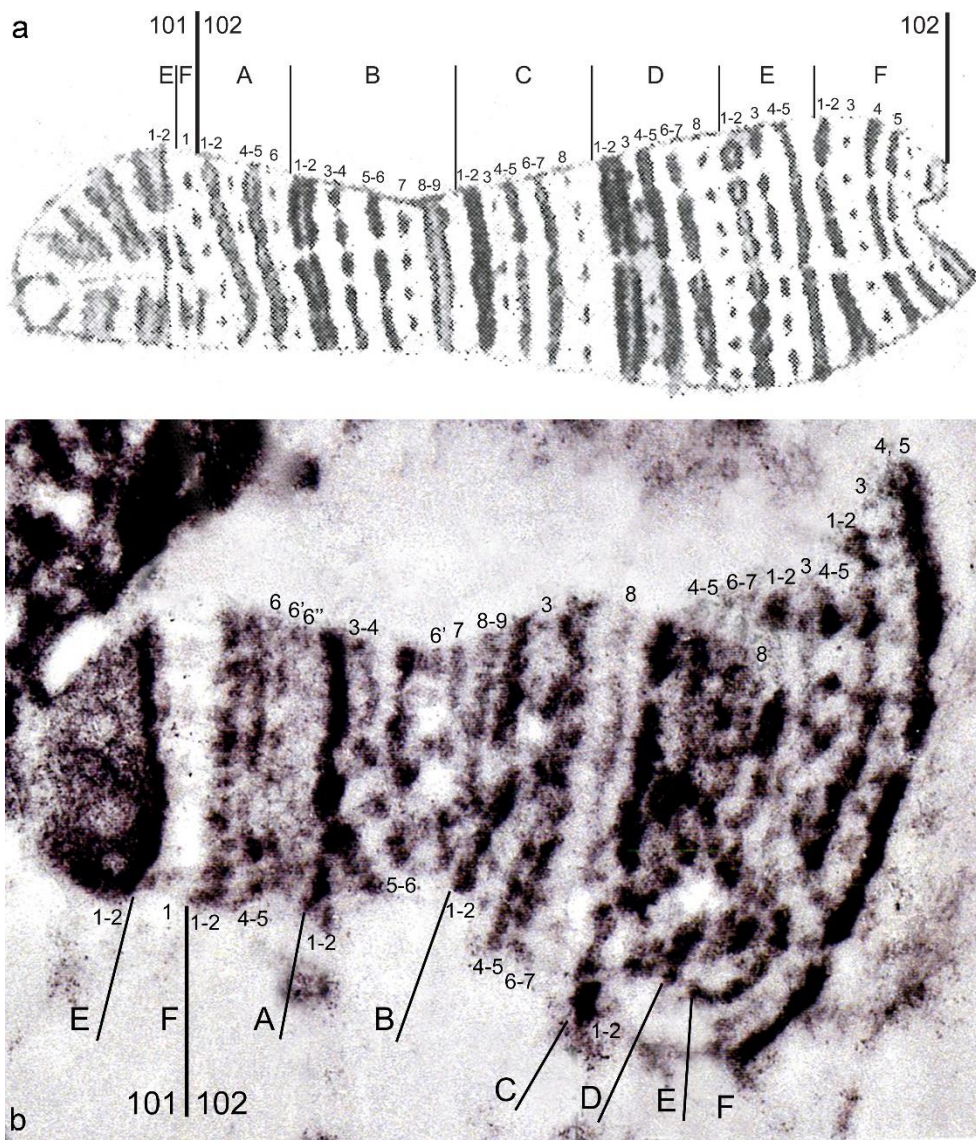

**Fig. S1** Images of the *D. melanogaster* fourth chromosome **a** The map by C. Bridges with the bands numbered in accordance with Saura *et al.* (2002). **b** Electron microscopic image of the fourth polytene chromosome of *Drosophila*. The image shows the band numbers as in Fig. S1 (a). The picture was kindly provided by V. F. Semeshin.
