# Supplementary material for: Molecular and genetic organization of bands and interbands in the dot chromosome of Drosophila melanogaster
Source: PubMed Central journal article supplement (PMC6536484; doi:10.1007/s00412-019-00703-x), 2019-04-30
Supplement: 412_2019_703_MOESM12_ESM.pdf [file 412_2019_703_MOESM12_ESM.pdf]

**Table S1.** Oligonucleotides used to obtain FISH probes from bands predicted by the four chromatin state model

| Probe   | Forward primer             | Reverse primer              | Probe coordinates (dm3) |
|---------|----------------------------|-----------------------------|-------------------------|
| PlexB   | 5'-ACAACCTTCGCTGATATT-3'   | 5'-TGTTCGCTTGCTTAGAG-3'     | chr4:59994-60799        |
| ci      | 5'-CATCCAGGTGCTTCTATAC-3'  | 5'-GTTCTCGGTAGTGGTTGA-3'    | chr4:69435-70241        |
| pan     | 5'-CCAAGTCGCAGCTCTATT-3'   | 5'-GCCTAAGAGTATCCACATCC-3'  | chr4:121380-122168      |
| CG32006 | 5'-TCCACCACACGCATTATT-3'   | 5'-GAGTTGGTTCTGTGTTCT-3'    | chr4:171797-172593      |
| Nfi     | 5'-TCTCACACACCGACATTAG-3'  | 5'-CCCAAGCCGAAGAGTTTA-3'    | chr4:291032-291853      |
| Lin29   | 5'-CATACGGACGGAAAGACTAA-3' | 5'-CCACACATAGGAGGAACAA-3'   | chr4:409421-410217      |
| zfh2    | 5'-GCGCATCTCCGAAATA-3'     | 5'-GGTTGAGAGTAAGCGTAGAG-3'  | chr4:546526-547326      |
| CG1909  | 5'-GAGCCGAGACGTACTTAAA-3'  | 5'-TCCCTCCGACTATCCTATC-3'   | chr4:605956-606771      |
| bt      | 5'-TGTAAGGGCGTCGTAAAG-3'   | 5'-CCTGGTCTATCTGGTTCATC-3'  | chr4:774728-775516      |
| Sox102F | 5'-GAGGTGAACACCTGATAAA-3'  | 5'-GACCTGGCAACGATAAT-3'     | chr4:826731-827536      |
| toy     | 5'-GTCAGAAACGCTTCTACT-3'   | 5'-CTTCCCGTTAGTCCAGATAC-3'  | chr4:1025961-1026761    |
| Rfabg   | 5'-CATCGACGGCAGTATCAA-3'   | 5'-TACTTCTCGGTCATAAC-3'     | chr4:1091079-1091901    |
| CG11155 | 5'-CGCAGTTCCCGAGATATT-3'   | 5'-AGAGCGACGGAATAAA-3'      | chr4:1154175-1154991    |
| CG33521 | 5'-GCTTTGTGGCGATAGTTTAC-3' | 5'-CTAGACCTCGGCGTTTATAG-3'  | chr4:1207907-1208708    |
| Cadps*  | 5'-TAGCTTATGTGGTGTACACG-3' | 5'-AGATGCAACTTGAGCATAGTG-3' | chr4:1268218-1269117    |

\*This probe from the end of the fourth chromosome was obtained by lowering the PCR elongation temperature to 60°C

**Table S2.** Oligonucleotides used to obtain FISH probes from open chromatin predicted by the four chromatin state model

| Probe     | Forward primer                 | Reverse primer                 | Probe coordinates (dm3) |
|-----------|--------------------------------|--------------------------------|-------------------------|
| Zip102B   | 5' - GGAGTCCACAATTAAGTCA - 3'  | 5' - GGGTATGCCCATGTTTATA - 3'  | chr4:331263-331983      |
| Hcf       | 5' - TATAGGGAAGCGTCTAGTT - 3'  | 5' - AAGACGACCATTAGCTCTT - 3'  | chr4:380790-381582      |
| Asator    | 5' - AGTTTCGTTGAACTTCTAT - 3'  | 5' - CAACTGGTGTCTCTATG - 3'    | chr4:502957-503631      |
| Eph       | 5' - CGTCCCTTAACAAGAATAC - 3'  | 5' - GCTTCTCGAGTTGTATCC - 3'   | chr4:631665-632380      |
| mav       | 5' - CCATTAGGGTTCCTTTGC - 3'   | 5' - CCGAATCCGATCTGGTTA - 3'   | chr4:646226-646906      |
| Ekar      | 5' - CCAATCTGACCAAGGGT - 3'    | 5' - CCCTGCAGTTACATTAC - 3'    | chr4:667070-667779      |
| Slip1     | 5' - CTACCAAGTCTGTAGTAA - 3'   | 5' - TTGGAAGAGCAGAGACCA - 3'   | chr4:686812-687535      |
| myo       | 5' - CAAATAGACCCGAAGAAAC - 3'  | 5' - GCTTACAATCCATCCAATAA - 3' | chr4:717011-717731      |
| l_Sox102F | 5' - TGTTACCATCCCTATTATAC - 3' | 5' - TCAACTCGGCTATTTATCC - 3'  | chr4:856150-856850      |
| CG11148   | 5' - CTTTCGTAACGAGACCTAAA - 3' | 5' - TGTGAAGGAGACAGTAATC - 3'  | chr4:888766-889498      |
| unc-13    | 5' - CAAGGGAGAAAGAAGAAGA - 3'  | 5' - ATTGCCCATGCAGTAATAAA - 3' | chr4:899961-900686      |
| l_unc-13  | 5' - CAAGGGAGGGTTAAGTATA - 3'  | 5' - CTAAGCAACAGTAGCGAAA - 3'  | chr4:925604-926283      |
| eIF4G     | 5' - CTGGAGCCTTACTTATTTG - 3'  | 5' - CGGAAAGGGCTCATTATC - 3'   | chr4:950896-951616      |
| mGluR     | 5' - GCCTATATCCTAACCAATAA - 3' | 5' - GTAGAATTTGAATCTCGAAG - 3' | chr4:968580-969277      |
| 4E-T      | 5' - TCTACGCATACAGTGATAG - 3'  | 5' - GTCCGATTCGTAGCAATA - 3'   | chr4:980957-981641      |
| CG11076   | 5' - CTTCGTCCAGGTCATTAG - 3'   | 5' - GATCCACATCTGCTAGTC - 3'   | chr4:1050543-1051253    |
| CaMKII    | 5' - GGCATGGGATAAAGCATG - 3'   | 5' - CGCATGTAACCTGCAAAG - 3'   | chr4:1072731-1073408    |
| Zyx       | 5' - CTGTATGACCTCCCTGT - 3'    | 5' - GTCGAGTGAGCGAATTTAT - 3'  | chr4:1082117-1082864    |
| Cals      | 5' - CGGCTTTGAGCTAATAAA - 3'   | 5' - GGGCAGAATGACTAAAAG - 3'   | chr4:1138891-1139561    |
| CG32017   | 5' - AGAGCATTCCCATACATTC - 3'  | 5' - CAATAAGTCTTTCCCAACC - 3'  | chr4:1167296-1167995    |
| pho       | 5' - GATACGGTCCACAATACA - 3'   | 5' - GGATTAGCAAAGGAGAAGT - 3'  | chr4:1202556-1203255    |
| PIP4K     | 5' - GAAATTCTTGCCATATTAG - 3'  | 5' - TCGTACATATGACCTTTG - 3'   | chr4:1217808-1218513    |
| l_Cadps   | 5' - CCACCATCGAAGTTATCG - 3'   | 5' - CGTGGAAACATGAGTATGA - 3'  | chr4:1235568-1236287    |
