# Supplementary material for: Molecular and genetic organization of bands and interbands in the dot chromosome of Drosophila melanogaster
Source: PubMed Central journal article supplement (PMC6536484; doi:10.1007/s00412-019-00703-x), 2019-04-30
Supplement: 412_2019_703_MOESM13_ESM.pdf [file 412_2019_703_MOESM13_ESM.pdf]

**Table S3** Localization of bands and interbands of the fourth chromosome on the molecular map of the *Drosophila* genome

| Band/interband | Start (dm3) | End (dm3) | FISH probes        | Genetic content                                                                                                  |
|----------------|-------------|-----------|--------------------|------------------------------------------------------------------------------------------------------------------|
| 101E1-2        | 24000       | 61999     | PlexB              | Coding part ( <i>PlexB</i> )                                                                                     |
| 101E1-2/F1     | 62800       | 66399     |                    | 5'UTR ( <i>PlexB</i> )                                                                                           |
| 101F1          | 66400       | 76599     | ci                 | Coding part ( <i>ci</i> )                                                                                        |
| 101F1/102A1-2  | 76600       | 91799     |                    | 5'UTRs of two genes ( <i>ci</i> , <i>pan</i> ) and one whole gene ( <i>RpS3A</i> )                               |
| 102A1-2        | 91800       | 148599    | pan                | Coding parts of two genes ( <i>pan</i> , <i>Ank</i> )                                                            |
| 102A1-2/A4-5   | 149400      | 157399    |                    | 5'UTRs head-to-head ( <i>Ank</i> , <i>CG32000</i> )                                                              |
| 102A4-5        | 157400      | 198799    | CG32006            | Polygenic ( <i>CG32000</i> , <i>CG32006</i> , <i>CG31997</i> , <i>CG33978</i> , <i>Arl4</i> )                    |
| 102A4-5/A6     | 198800      | 200999    |                    | 5'UTR ( <i>Arl4</i> )                                                                                            |
| 102A6          | 204400      | 212799    |                    | Coding part ( <i>CG2316</i> )                                                                                    |
| 102A6/A6'      | 212800      | 216599    |                    | 5'UTR ( <i>CG2316</i> )                                                                                          |
| 102A6'         | 217000      | 225599    |                    | Coding part ( <i>CG31998</i> )                                                                                   |
| 102A6'/A6''    | 225600      | 231799    |                    | 5'UTRs head-to-head ( <i>CG31998</i> , <i>Crk</i> )                                                              |
| 102A6''        | 231800      | 246599    |                    | Coding parts of two genes ( <i>Crk</i> , <i>CG31999</i> )                                                        |
| 102A6''/B1-2   | 246600      | 248799    |                    | 5'UTRs head-to-head ( <i>CG31999</i> , <i>yellow-h</i> )                                                         |
| 102B1-2        | 248800      | 326199    | Nfi                | Polygenic ( <i>yellow-h</i> , <i>CG1674</i> , <i>dpr7</i> , <i>RhoGAP102A</i> , <i>Nfi</i> , <i>Syt7</i> )       |
| 102B1-2/B3-4   | 326200      | 338199    | Zip102B            | 5'UTRs of two genes ( <i>Syt7</i> , <i>CG32850</i> ) and two whole genes ( <i>Rad23</i> , <i>Zip102B</i> )       |
| 102B3-4        | 338400      | 378199    |                    | Coding parts of two genes ( <i>CG32850</i> , <i>PMCA</i> )                                                       |
| 102B3-4/B5-6   | 378400      | 382199    | Hcf                | 5'UTRs head-to-head ( <i>PMCA</i> , <i>Hcf</i> )                                                                 |
| 102B5-6        | 382600      | 463799    | Lin29              | Polygenic ( <i>Hcf</i> , <i>dati</i> , <i>Igs</i> )                                                              |
| 102B5-6/B7     | 463800      | 469399    |                    | 5'UTRs head-to-head ( <i>Igs</i> , <i>CaMKI</i> )                                                                |
| 102B7          | 469800      | 476399    |                    | Coding part ( <i>CaMKI</i> )                                                                                     |
| 102B7/B8-9     | 479600      | 488999    |                    | 5'UTRs head-to-head ( <i>bip2</i> , <i>CG33941</i> )                                                             |
| 102B8-9        | 489600      | 501799    |                    | Coding parts of two genes ( <i>CG33941</i> , <i>Asator</i> )                                                     |
| 102B8-9/C1-2   | 501800      | 507799    | Asator             | 5'UTR ( <i>Asator</i> )                                                                                          |
| 102C1-2        | 507800      | 576199    | zfh2               | Two genes ( <i>zfh2</i> , <i>Thd1</i> )                                                                          |
| 102C1-2/C3     | 576400      | 579799    |                    | 5'UTRs head-to-head ( <i>Thd1</i> , <i>Pur-alpha</i> )                                                           |
| 102C3          | 579800      | 590599    |                    | Coding parts of two genes ( <i>Pur-alpha</i> , <i>ND-49</i> )                                                    |
| 102C3/C4-5     | 590600      | 593399    |                    | 5'UTRs head-to-head ( <i>ND-49</i> , <i>Ephrin</i> )                                                             |
| 102C4-5        | 593400      | 630399    | CG1909             | Polygenic ( <i>Ephrin</i> , <i>CG1909</i> , <i>onecut</i> )                                                      |
| 102C4-5/C6-7   | 630600      | 632999    | Eph                | 5'UTR ( <i>Eph</i> )                                                                                             |
| 102C6-7        | 634000      | 679399    | mav, Ekar          | Polygenic ( <i>Eph</i> , <i>mav</i> , <i>Gat</i> , <i>Ekar</i> , <i>gw</i> )                                     |
| 102C6-7/C8     | 679400      | 692399    | Slip1              | 5'UTRs of two genes ( <i>gw</i> , <i>CG11360</i> ) and one whole gene ( <i>Slip1</i> )                           |
| 102C8          | 700800      | 714599    |                    | Coding parts of two genes ( <i>CG11360</i> , <i>myo</i> )                                                        |
| 102C8/D1-2     | 714600      | 718599    | myo                | 5'UTRs head-to-head ( <i>myo</i> , <i>ey</i> )                                                                   |
| 102D1-2        | 718600      | 807599    | bt                 | Polygenic ( <i>ey</i> , <i>bt</i> , <i>MED26</i> )                                                               |
| 102D1-2/D4-5   | 807600      | 809599    |                    | 5'UTR ( <i>MED26</i> )                                                                                           |
| 102D4-5        | 817400      | 886399    | Sox102F, 1_Sox102F | Polygenic ( <i>Sox102F</i> , <i>fd102C</i> , <i>Gyf</i> )                                                        |
| 102D4-5/D6-7   | 886400      | 901399    | CG11148, unc13     | 5'UTR ( <i>Gyf</i> ) and coding part of another gene ( <i>unc-13</i> )                                           |
| 102D6-7        | 901400      | 950399    | 1_unc13            | Coding parts of two genes ( <i>unc-13</i> , <i>eIF4G</i> )                                                       |
| 102D6-7/D8     | 950400      | 951999    | eIF4G              | 5'UTR ( <i>eIF4G</i> )                                                                                           |
| 102D8          | 955000      | 968199    |                    | One whole gene ( <i>mGluR</i> )                                                                                  |
| 102D8/E1-2     | 968200      | 984999    | mGluR, 4E-T        | One whole gene ( <i>4E-T</i> ) and one 3'UTR ( <i>fuss</i> )                                                     |
| 102E1-2        | 985000      | 1044399   | toy                | Polygenic ( <i>fuss</i> , <i>toy</i> , <i>PlexA</i> )                                                            |
| 102E1-2/E3     | 1045600     | 1053999   | CG11076            | 5'UTRs of two genes ( <i>PlexA</i> , <i>ATPsynbeta</i> ) and two whole genes ( <i>CG11077</i> , <i>CG11076</i> ) |
| 102E3          | 1054000     | 1071199   |                    | Coding parts of two genes ( <i>ATPsynbeta</i> , <i>CaMKII</i> )                                                  |
| 102E3/E4-5     | 1071200     | 1084199   | CaMKII, Zyx        | 5'UTRs of two genes ( <i>CaMKII</i> , <i>apolpp</i> ) and one whole gene ( <i>Zyx</i> )                          |
| 102E4-5        | 1084400     | 1133399   | Rfabg              | Polygenic ( <i>apolpp</i> , <i>Actbeta</i> , <i>sv</i> )                                                         |
| 102E4-5/F1-2   | 1133400     | 1145999   | Cals               | Two whole genes ( <i>Cals</i> , <i>Arf102F</i> )                                                                 |
| 102F1-2        | 1146200     | 1201399   | CG11155, CG32017   | Polygenic ( <i>CG11155</i> , <i>CG32017</i> , <i>Kif3C</i> , <i>pho</i> )                                        |
| 102F1-2/F3     | 1201400     | 1203799   | pho                | 5'UTR ( <i>pho</i> )                                                                                             |
| 102F3          | 1203800     | 1233399   | CG33521, PIP4K     | Polygenic ( <i>CG33521</i> , <i>PIP4K</i> , <i>Mitf</i> , <i>Dyrk3</i> )                                         |
| 102F3/F4,5     | 1233400     | 1238799   | 1_Cadps            | 5'UTRs head-to-head ( <i>Dyrk3</i> , <i>Cadps</i> )                                                              |
| 102F4,5        | 1239800     | 1275599   | Cadps              | Coding part ( <i>Cadps</i> )                                                                                     |
